# Supplementary material for: A graphene@framework polymer derived from addition polymerization of phthalocyanine/dicarboxaldehyde as a negative material for lithium-ion batteries
Source: Royal Society of Chemistry journal article supplement (doi:10.1039/d1qm00929j), 2021-01-01
Supplement: d1qm00929j1.pdf [file d1qm00929j1.pdf]

## Supporting Information

### **Graphene @ framework polymer derived from addition polymerization of phthalocyanine/dicarboxaldehyde as a negative material for lithium-ion batteries**

Lihong Tao<sup>[a]</sup>, Jianjun Zhao<sup>[a]</sup>, Jun Chen\*<sup>[a]</sup>, He Zhang<sup>[a]</sup>, Luyi Wang<sup>[a]</sup>, Shengwen Zhong\*<sup>[a]</sup>, Hua Wang<sup>[b]</sup>, Jianbing Chen<sup>[b]</sup>, Lijue Wu<sup>[b]</sup>

<sup>[a]</sup> *School of Materials Science and Engineering, Jiangxi Provincial Key Laboratory of Power Batteries and Materials, Jiangxi University of Sciences and Technology, Ganzhou 341000, China, E-mail: chenjun@jxust.edu.cn, zhongshw@126.com.*

<sup>[b]</sup> *Guangdong Jiana Energy Technology Co Ltd, Qingyuan Jiazhi New Material Research Institute Co. Ltd., Qingyuan 511500, China.*

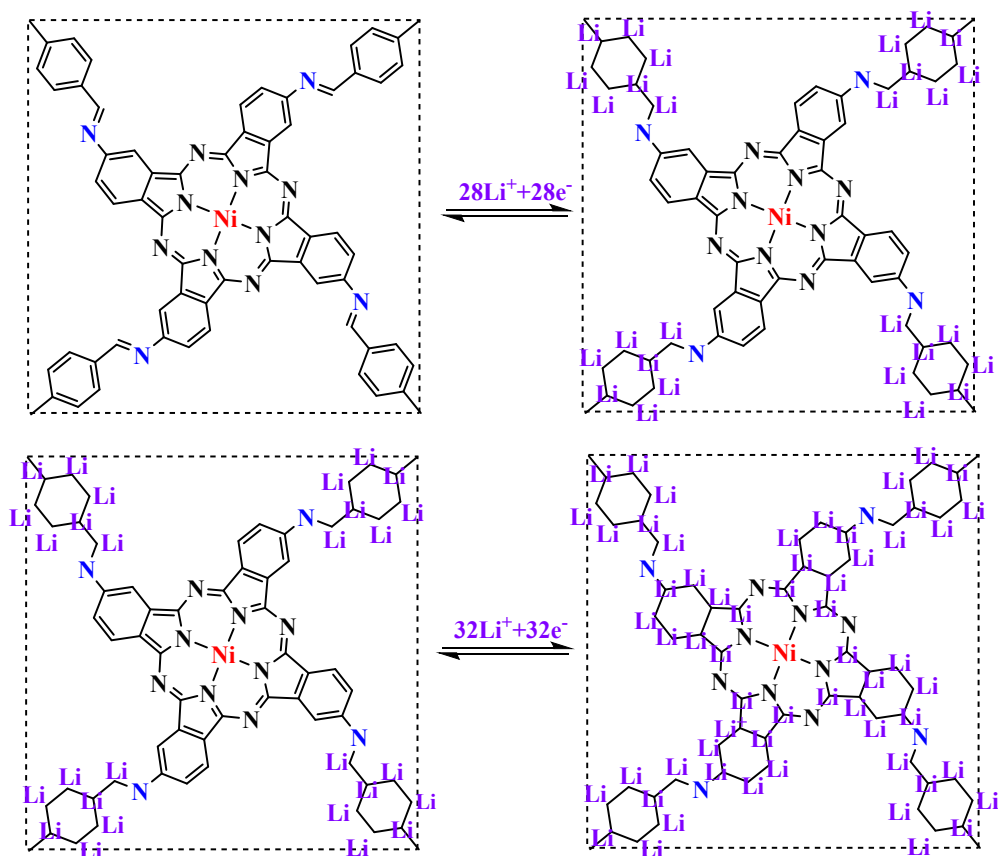

**Fig. S1.** Mechanism for  $\text{Li}^+$  intercalation for a **BDC-NiPc** monomer.

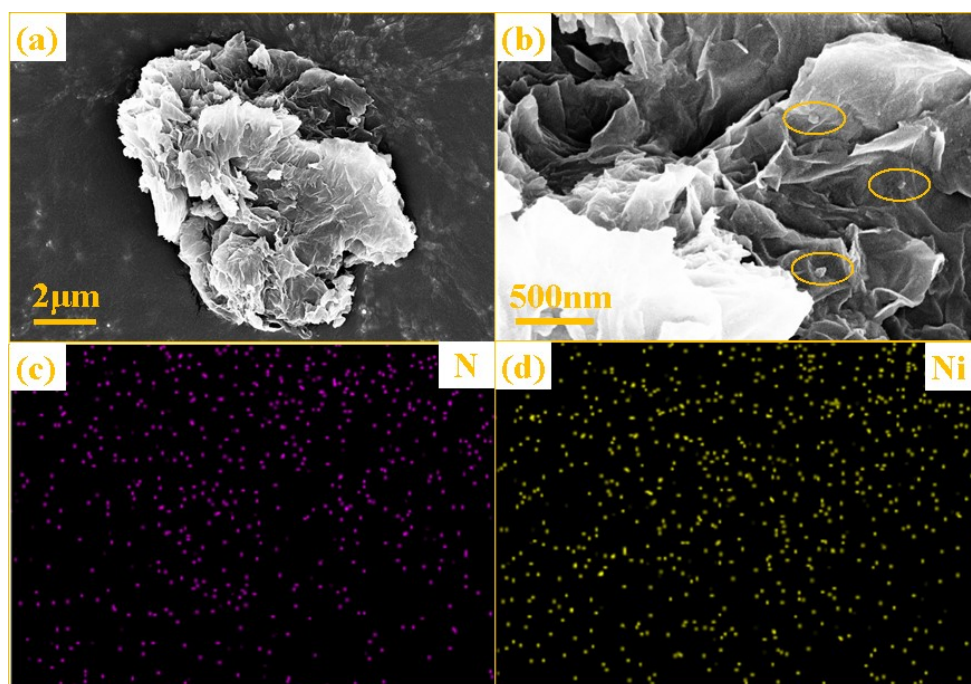

**Fig. S2.** SEM images of (a,b) **BDC-NiPc@GN** with ethanol as the dispersant; EDS images (c,d) of N/Ni in **BDC-NiPc@GN**

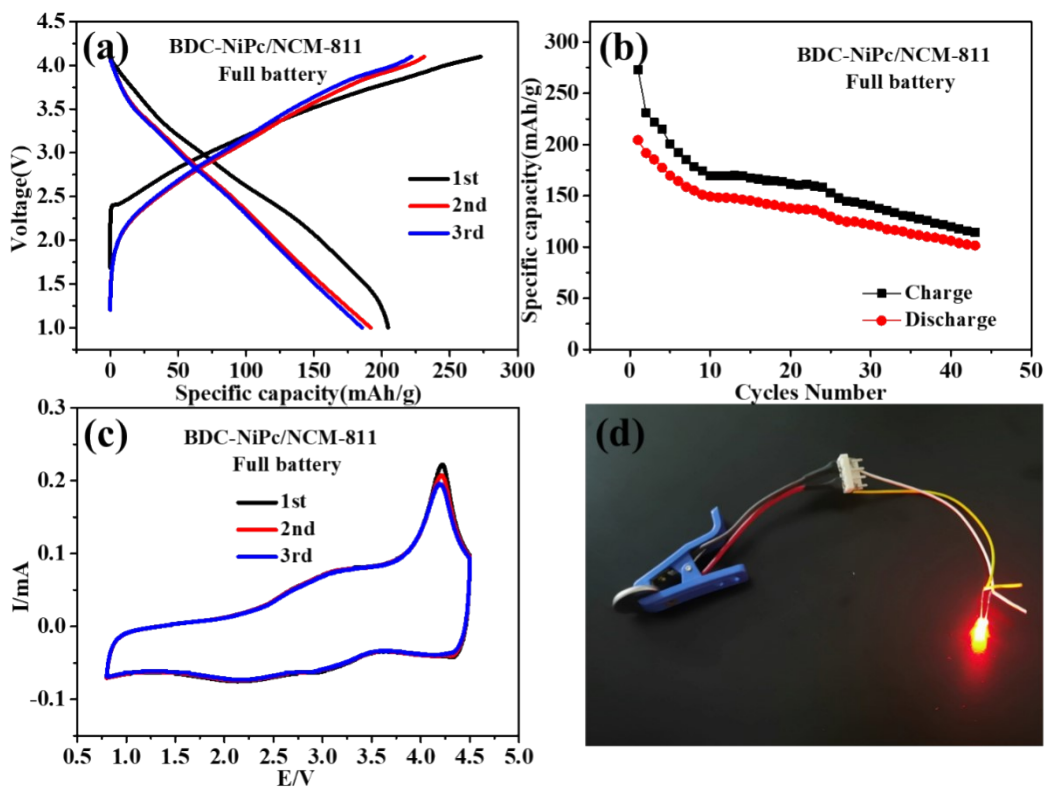

**Fig. S3.** (a) The initial charge/discharge performance and cycle performance of a **BDC-NiPc/NCM-811** full battery; (c) CV curves for the **BDC-NiPc/NCM-811** full battery; (d) photograph of an LED light powered by a **BDC-NiPc/NCM-811** full battery
